# Supplementary material for: The solution structure of supramolecular lanthanide triple helices revisited: application of crystal-field independent paramagnetic NMR techniques to mono- and di-metallic complexes†
Source: Royal Society of Chemistry journal article supplement (doi:10.1039/b000147n), 2000-01-01
Supplement: b000147n.doc [file b000147n.doc]

**The solution structure of supramolecular lanthanide triple helices revisited: application of crystal-field independent paramagnetic NMR techniques to mono- and dimetallic complexes**

Stéphane Rigault, Claude Piguet,* and Jean-Claude G. Bünzli

**Supporting informations**

Table S1 Geometric ratio and intercepts obtained from plots of vs according to eq 8 for [Ln(L2)3]3+ (CD3CN, 298 K).

|  | **H2-H3** | **H2-C1** | **H2-C2** | **H2-C**3 | **H2-C4** |
| --- | --- | --- | --- | --- | --- |
| ***Rik* (Ce-Tb)a** | **0.93(5)** | **0.33(3)** | **0.39(3)** | **0.91(4)** | **-0.7(3)** |
| ***Rik* (Er-Yb)b** | **1.02(9)** | **0.14(8)** | **1.38(6)** | **0.65(4)** | **0.08(2)** |
| ***Rik* ([Eu(L2)3]3+)c** | **1.018** | **0.213** | **0.499** | **0.591** | **16.321** |
| ***Fi -Rik.Fk* (Ce-Tb)a** | **0.02(4)** | **0.04(6)** | **-1.1(1)** | **1.10(4)** | **0.6(2)** |
| ***Fi -Rik.Fk* (Er-Yb)b** | **0.01(4)** | **0.1(2)** | **-3.3(2)** | **0.68(2)** | **0.11(9)** |
| ***Fi -Rik.Fk* ([Eu(L2)3]3+)c** | **0.030** | **0.046** | **-1.037** | **1.063** | **0.578** |
|  |  |  |  |  |  |
|  | **H3-C1** | **H3-C2** | **H3-C3** | **H3-C4** | **C1-C2** |
| ***Rik* (Ce-Tb)a** | **0.35(4)** | **0.41(4)** | **0.97(8)** | **-0.8(3)** | **1.16(6)** |
| ***Rik* (Er-Yb)b** | **0.15(6)** | **1.3(2)** | **0.64(1)** | **0.08(1)** | **7(4)** |
| ***Rik* ([Eu(L2)3]3+)c** | **0.209** | **0.490** | **0.580** | **16.025** | **2.339** |
| ***Fi -Rik.Fk* (Ce-Tb)a** | **0.03(9)** | **-1.1(2)** | **1.14(8)** | **0.7(2)** | **-3.3(3)** |
| ***Fi -Rik.Fk* (Er-Yb)b** | **0.1(1)** | **-3.2(5)** | **0.66(7)** | **0.09(6)** | **-17(11)** |
| ***Fi -Rik.Fk* ([Eu(L2)3]3+)c** | **0.019** | **-1.127** | **1.094** | **0.595** | **-3.242** |
|  |  |  |  |  |  |
|  | **C1-C3** | **C1-C4** | **C2-C3** | **C2-C4** | **C3-C4** |
| ***Rik* (Ce-Tb)a** | **2.7(3)** | **-2(1)** | **2.3(3)** | **-1.8(8)** | **-0.8(3)** |
| ***Rik* (Er-Yb)b** | **4(2)** | **0.5(1)** | **0.47(5)** | **0.06(2)** | **0.13(2)** |
| **Rik ([Eu(L2)3]3+)c** | **2.772** | **76.527** | **1.185** | **32.717** | **27.607** |
| ***Fi –Rik.Fk* (Ce-Tb)a** | **3.1(3)** | **1.7(7)** | **5.6(3)** | **4.4(5)** | **-0.5(2)** |
| ***Fi –Rik.Fk* (Er-Yb)b** | **3.5(7)** | **0.1(5)** | **2.87(2)** | **2.46(8)** | **-0.9(1)** |
| ***Fi –Rik.Fk* ([Eu(L2)3]3+)c** | **2.994** | **1.465** | **5.363** | **4.107** | **-0.530** |

a Values for the first isostructural series (Sm has been removed because of its faint paramagnetism).4 b Values for the second isostructural series. c Calculated from the crystal structure of [Eu(L2)3](CF3SO3)3 after averaging to *D3* symmetry.4

Table S2 Geometric ratio and intercepts obtained from plots of vs according to eq 8 for [LnCo(L4)3]6+ (CD3CN, 298 K).

|  | **H1-H2** | **H1-H3** | **H1-H4** | **H1-H5** | **H1-H6** | **H1-H9** | **H1-H10** | **H1-H11** | **H1-H12** | **H1-H13** | **H1-H14** |
| --- | --- | --- | --- | --- | --- | --- | --- | --- | --- | --- | --- |
| ***Rik*a** | **1.83(6)** | **1.22(3)** | **1.00(5)** | **1.10(8)** | **0.244(7)** | **0.076(2)** | **1.07(6)** | **-4.6(7)** | **-0.22(1)** | **-0.33(2)** | **-0.48(2)** |
| ***Rik* (cryst.)b** | **1.648** | **1.115** | **1.243** | **2.013** | **0.232** | **0.107** | **1.376** | **9.736** | **-0.228** | **-0.417** | **-0.500** |
| ***Fi -Rik.Fk* a** | **0.01(1)** | **0.01(1)** | **0.01(1)** | **0.01(2)** | **0.011(7)** | **0.004(7)** | **0.00(2)** | **0.5(1)** | **0.044(7)** | **0.04(1)** | **0.06(1)** |
| ***Fi -Rik.Fk* (cryst.)b** | **-0.016** | **-0.016** | **-0.017** | **-0.004** | **-0.017** | **-0.020** | **-0.015** | **0.574** | **0.025** | **0.011** | **0.049** |
|  |  |  |  |  |  |  |  |  |  |  |  |
|  | **H2-H3** | **H2-H4** | **H2-H5** | **H2-H6** | **H2-H9** | **H2-H10** | **H2-H11** | **H2-H12** | **H2-H13** | **H2-H14** | **H3-H4** |
| ***Rik*a** | **0.665(9)** | **0.55(1)** | **0.60(3)** | **0.133(2)** | **0.0413(4)** | **0.58(5)** | **-2.5(4)** | **-0.120(5)** | **-0.18(1)** | **-0.26(1)** | **0.82(3)** |
| ***Rik* (cryst.)b** | **0.677** | **0.755** | **1.222** | **0.141** | **0.065** | **0.835** | **5.909** | **-0.138** | **-0.253** | **-0.303** | **1.115** |
| ***Fi -Rik.Fk* a** | **0.000(2)** | **0.000(4)** | **0.002(7)** | **0.000(2)** | **-0.004(1)** | **-0.01(1)** | **0.27(6)** | **0.018(6)** | **0.014(9)** | **0.026(8)** | **0.001(8)** |
| ***F -Rik.Fk* (cryst.)b** | **0.000** | **-0.001** | **0.007** | **0.000** | **-0.002** | **0.000** | **0.314** | **0.022** | **0.014** | **0.035** | **-0.001** |
|  |  |  |  |  |  |  |  |  |  |  |  |
|  | **H3-H5** | **H3-H6** | **H3-H9** | **H3-H10** | **H3-H11** | **H3-H12** | **H3-H13** | **H3-H14** | **H4-H5** | **H4-H6** | **H4-H9** |
| ***Rik*a** | **0.91(6)** | **0.200(1)** | **0.062 (0)** | **0.88(6)** | **-3.725** | **-0.180(5)** | **-0.27(1)** | **-0.39(2)** | **1.11(3)** | **0.24(1)** | **0.075(3)** |
| ***Rik* (cryst.)b** | **1.806** | **0.208** | **0.096** | **1.234** | **8.734** | **-0.204** | **-0.374** | **-0.448** | **1.619** | **0.186** | **0.086** |
| ***Fi -Rik.Fk* a** | **0.00(1)** | **0.000(1)** | **-0.006(1)** | **-0.01(1)** | **0.4049** | **0.027(6)** | **0.02(1)** | **0.04(1)** | **0.004(7)** | **0.00(1)** | **-0.009(9)** |
| ***Fi -Rik.Fk* (cryst.)b** | **0.010** | **0.000** | **-0.003** | **0.001** | **0.475** | **0.034** | **0.022** | **0.053** | **0.014** | **0.001** | **-0.003** |
|  |  |  |  |  |  |  |  |  |  |  |  |
|  | **H4-H10** | **H4-H11** | **H4-H12** | **H4-H13** | **H4-H14** | **H5-H6** | **H5-H9** | **H5-H10** | **H5-H11** | **H5-H12** | **H5-H13** |
| ***Rik*a** | **1.0(1)** | **-4(1)** | **-0.22(1)** | **-0.32(3)** | **-0.47(3)** | **0.21(1)** | **0.067(4)** | **0.9(1)** | **-4.0(8)** | **-0.19(2)** | **-0.28(3)** |
| ***Rik* (cryst.)b** | **1.106** | **7.831** | **-0.183** | **-0.335** | **-0.402** | **0.115** | **0.053** | **0.683** | **4.837** | **-0.113** | **-0.207** |
| ***Fi -Rik.Fk* a** | **-0.02(3)** | **-0.5(1)** | **0.03(2)** | **0.02(2)** | **0.04(2)** | **-0.01(1)** | **-0.01(1)** | **-0.02(3)** | **0.4(1)** | **0.02(2)** | **0.01(5)** |
| ***Fi -Rik.Fk* (cryst.)b** | **0.002** | **-0.142** | **0.0417** | **0.027** | **0.065** | **-0.012** | **-0.015** | **-0.011** | **0.495** | **0.025** | **0.012** |
|  |  |  |  |  |  |  |  |  |  |  |  |
|  | **H5-H14** | **H6-H9** | **H6-H10** | **H6-H11** | **H6-H12** | **H6-H13** | **H6-H14** | **H9-H10** | **H9-H11** | **H9-H12** | **H9-H13** |
| ***Rik*a** | **-0.42(4)** | **0.311(3)** | **4.4(3)** | **-19(3)** | **-0.90(2)** | **-1.34(6)** | **-1.96(9)** | **14(1)** | **-60(10)** | **-2.90(9)** | **-4.3(2)** |
| ***Rik* (cryst.)b** | **-0.248** | **0.462** | **5.941** | **42.050** | **-0.983** | **-1.801** | **-2.159** | **12.870** | **91.088** | **-2.130** | **-3.901** |
| ***Fi -Rik.Fk* a** | **0.03(2)** | **-0.03(1)** | **-0.07(7)** | **2.0(5)** | **0.13(3)** | **0.11(6)** | **0.20(5)** | **-0.1(2)** | **7(1)** | **0.5(1)** | **0.4(2)** |
| ***Fi -Rik.Fk* (crystal)b** | **0.045** | **-0.015** | **0.004** | **2.371** | **0.170** | **0.110** | **0.265** | **0.062** | **7.711** | **0.597** | **0.403** |
|  |  |  |  |  |  |  |  |  |  |  |  |
|  | **H9-H14** | **H10-H11** | **H10-H12** | **H10-H13** | **H10-H14** | **H11-H12** | **H11-H13** | **H11-H14** | **H12-H13** | **H12-H14** | **H13-H14** |
| ***Rik*a** | **-6.3(3)** | **-4.2(7)** | **-0.202(9)** | **-0.30(2)** | **-0.44(2)** | **0.042(7)** | **0.06(1)** | **0.09(1)** | **1.48(5)** | **2.17(6)** | **1.45(6)** |
| ***Rik* (crystal)b** | **-4.677** | **7.078** | **-0.165** | **-0.303** | **-0.363** | **-0.023** | **-0.043** | **-0.051** | **1.832** | **2.196** | **1.199** |
| ***Fi -Rik.Fk* a** | **0.7(4)** | **0.48(9)** | **0.04(1)** | **0.04(1)** | **0.06(1)** | **0.106(8)** | **0.11(1)** | **0.103(8)** | **0.03(4)** | **-0.07(7)** | **-0.06(3)** |
| ***Fi -Rik.Fk* (crystal)b** | **0.902** | **0.541** | **0.037** | **0.024** | **0.059** | **0.120** | **0.123** | **0.115** | **0.067** | **-0.106** | **-0.115** |

a Values for the isostructural series (Ln = Ce-Yb, Sm has been removed because of its faint paramagnetism). b Calculated from the crystal structure of [LaCo(L4)3](ClO4)5.5(OH)0.5 after averaging to *C3* symmetry.7

Table S3 Geometric ratio obtained from plots of vs according to eq 13 for [Ln2(L5-2H)3] (D2O, 298 K).

| *R****ik*** | **bCH2-H3** | **bCH2-H4** | **bCH2-H5** | **bCH2-H4'** | **bCH2-H6'** | **bCH2-H7'** | **H3-H4** |
| --- | --- | --- | --- | --- | --- | --- | --- |
| **(Ce-Yb)a** | **-0.32(1)** | **-0.33(1)** | **-0.27(1)** | **0.049(2)** | **2.3(4)** | **d** | **1.03(3)** |
| ***d* = 8.81 Åb** | **-0.250** | **-0.296** | **-0.210** | **0.051** | **4.433** | **-2.048** | **1.183** |
| ***d* = 8.44 Åc** | **-0.200** | **-0.246** | **-0.183** | **0.042** | **13.175** | **-1.273** | **1.234** |
| ***d* = 8.62 Åc** | **-0.150** | **-0.193** | **-0.151** | **0.032** | **-5.977** | **-0.788** | **1.285** |
| ***d* = 8.99 Åc** | **-0.303** | **-0.344** | **-0.233** | **0.059** | **3.053** | **-3.500** | **1.134** |
| ***d* = 9.18 Åc** | **-0.389** | **-0.389** | **-0.253** | **0.068** | **2.488** | **-7.241** | **1.085** |
|  |  |  |  |  |  |  |  |
|  | **H3-H5** | **H3-H4'** | **H3-H6'** | **H3-H7'** | **H4-H5** | **H4-H4'** | **H4-H6'** |
| **(Ce-Yb)a** | **0.84(2)** | **-0.15(1)** | **-7(1)** | **d** | **0.82(1)** | **-0.15(1)** | **-7(1)** |
| ***d* = 8.81 Åb** | **0.839** | **-0.202** | **-17.713** | **-2.210** | **0.709** | **-0.171** | **-14.968** |
| ***d* = 8.44 Åc** | **0.917** | **-0.208** | **-66.035** | **6.379** | **0.743** | **-0.169** | **-53.520** |
| ***d* = 8.62 Åc** | **1.003** | **-0.215** | **39.797** | **5.247** | **0.781** | **-0.167** | **30.963** |
| ***d* = 8.99 Åc** | **0.769** | **-0.195** | **-10.076** | **11.551** | **0.678** | **-0.172** | **-8.887** |
| ***d* = 9.18 Åc** | **0.705** | **-0.189** | **-6.945** | **20.209** | **0.650** | **-0.174** | **-6.401** |
|  |  |  |  |  |  |  |  |
|  | **H4-H7'** | **H5-H4'** | **H5-H6'** | **H5-H7'** | **H4'-H6'** | **H4'-H7'** | **H6'-H7'** |
| **(Ce-Yb)a** | **d** | **-0.18(1)** | **-8.7(1.2)** | **d** | **46(7)** | **d** | **d** |
| ***d* = 8.81 Åb** | **6.915** | **-0.015** | **0.004** | **0.005** | **87.771** | **-40.549** | **-0.462** |
| ***d* = 8.44 Åc** | **5.170** | **-0.227** | **-72.040** | **6.959** | **316.962** | **-30.620** | **-0.097** |
| ***d* = 8.62 Åc** | **4.082** | **-0.214** | **39.667** | **5.230** | **-185.049** | **-24.398** | **0.132** |
| ***d* = 8.99 Åc** | **10.187** | **-0.254** | **-13.105** | **15.023** | **51.576** | **-59.123** | **-1.146** |
| ***d* = 9.18 Åc** | **18.625** | **-0.268** | **-9.848** | **28.656** | **36.760** | **-106.967** | **-2.910** |

a Sm has been removed because of its faint paramagnetism.9 b Calculated from the crystal structure of [Eu2(L5-2H)3] after averaging to *D3* symmetry.9 c Calculated from the crystal structure of [Eu2(L5-2H)3] with a fixed intermetallic distance and after averaging to *D3* symmetry (see text). d No Rik values are obtained (see text).

Table S4 Comparison of calculated from the crystal structure of [LaCo(L4)3](ClO4)5.5 (OH)0.5 after averaging the axial coordinates (R*ik*(crystA)) or the dipolar factors of each strand (R*ik*(crystB)) to *C3* symmetry.a

|  | **H1-H2** | **H1-H3** | **H1-H4** | **H1-H5** | **H1-H6** | **H1-H9** |
| --- | --- | --- | --- | --- | --- | --- |
| **R*ik*(crystA)** | **1.648** | **1.115** | **1.243** | **2.013** | **0.232** | **0.107** |
| **R*ik*(crystB)** | **1.648** | **1.115** | **1.248** | **2.013** | **0.233** | **0.107** |
|  |  |  |  |  |  |  |
|  | **H1-H10** | **H1-H11** | **H1-H12** | **H1-H13** | **H1-H14** |  |
| **R*ik*(crystA)** | **1.376** | **9.736** | **-0.228** | **-0.417** | **-0.500** |  |
| **R*ik*(crystB)** | **1.379** | **14.033** | **-0.228** | **-0.418** | **-0.506** |  |

**a A complete set of *Rik* data can be generated according to .**
